# Supplementary material
Source: PubMed Central journal article supplement (PMC3887790)
Supplement: molcell-34-5-463-7-supplementary.pdf [file molcell-34-5-463-7-supplementary.pdf]

**Constitutive expression of mammalian nitric oxide synthase in plant triggers  
disease resistance responses to pathogens**

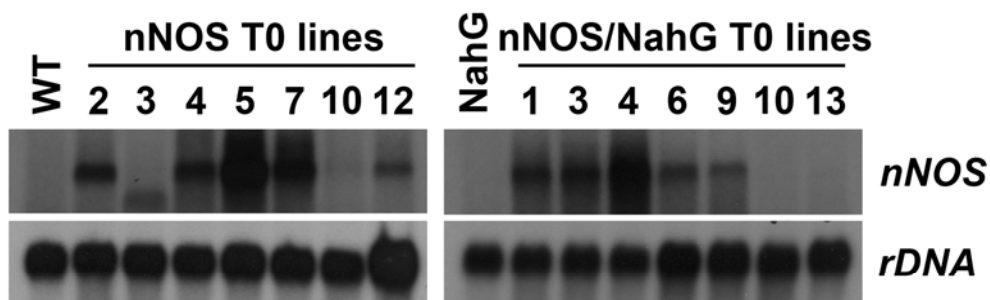

**Figure S1**

**Fig. S1.** Expression of *nNOS* gene in tobacco transgenic T<sub>0</sub> lines.

Total RNA was isolated from axenically grown wild-type plant (*WT*), *nNOS* transgenic T<sub>0</sub> plants (*nNOS*), *NahG* transgenic plant (*NahG*), and *nNOS/NahG* transgenic T<sub>0</sub> plant (*nNOS/NahG*). The transcript levels of *nNOS* gene were analyzed by Northern blot analysis. The *rDNA* transcript was used as a loading control.
